# Supplementary material for: Real-time positioning in logging: Effects of forest stand characteristics, topography, and line-of-sight obstructions on GNSS-RF transponder accuracy and radio signal propagation
Source: PLoS One. 2018 Jan 11;13(1):e0191017. doi: 10.1371/journal.pone.0191017 (PMC5764320; doi:10.1371/journal.pone.0191017)
Supplement: S2 Table — (XLSX) [file pone.0191017.s002.xlsx]

## Sheet: RMSE
Triangle point	Stand	Point	Longitude	Latitude	Aspect (degrees)	Aspect (class)	Slope (%)	Total basal area (m2/ha)	Trees per ha	Mean ht (m)	QMD (cm)	Shrub (m)	Coniferous veg (m)	Tree (m)	CWD (m)	Shrub/coniferous veg (m)	Shrub/CWD (m)	Coniferous veg/CWD (m)	Forest road	Stream	Boulder	Concave	Convex	Time faller crossed geofence	Geofence alert at X	RMSE (m)	Day
X	BM617	BM617X	-116.814	46.7957	225	S	12.5	50.7836	433.333	21.6769	38.6283	3.15556	0.8	0.133333	0	0.733333	0	0	0	0	0	0	1	2016-09-24 14:10:17	2016-09-24 14:11:07	4.66763	Sep24
X	BM638	BM638X	-116.809	46.7921	105	E	12	24.6603	200	20	39.6222	23.4444	0	0.133333	0	0	0	0	1	0	0	0	0	2016-09-24 15:40:12	2016-09-24 15:40:51	4.62941	Sep24
X	WH375	WH375X	-116.859	46.8392	349	N	66.5	59.0931	566.667	26.2529	36.4384	0	0	0.466667	2.48889	0	0	0	0	1	0	1	0	2016-09-26 11:26:10	2016-09-26 11:26:26	9.64674	Sep26
X	WH383	WH383X	-116.852	46.8388	66	E	28	72.9927	866.667	25.4615	32.7468	2.66667	2.2	0	0.444444	0	0	0	1	1	0	1	1	2016-09-26 12:43:35	2016-09-26 12:44:21	7.01863	Sep26
X	WH238	WH238X	-116.843	46.8444	38	N	50.5	1.02321	66.6667	7.5	13.9792	3.2	16.1111	0	0.444444	0	0	0	0	1	0	1	1	2016-09-26 13:51:27	2016-09-26 13:51:40	1.81203	Sep26
X	WH201	WH201X	-116.838	46.8451	253	W	6	12.2774	66.6667	21.5	48.4232	0	0	0	0	0	0	0	0	0	0	0	0	2016-09-26 14:57:56	2016-09-26 14:58:00	4.39658	Sep26
X	EH352	EH352X	-116.804	46.8389	3	N	13.5	0	0	0	0	0.688889	0.444444	0	0	0	0	0	0	0	0	1	0	2016-09-27 13:10:38	2016-09-27 13:10:58	2.78077	Sep27
X	EH395	EH395X	-116.8	46.8355	356	N	3	44.5882	566.667	21.9471	31.652	2.84444	6.11111	0	0	0	0	0	1	1	0	0	0	2016-09-27 14:29:17	2016-09-27 14:29:40	8.42219	Sep27
X	EH379	EH379X	-116.793	46.8381	68	E	35.5	36.3127	466.667	23.1571	31.4761	1.75556	3.44444	0.466667	0	0	0	0	0	1	0	0	1	2016-09-27 15:46:13	2016-09-27 15:46:12	5.97952	Sep27
X	FC527	FC527X	-116.764	46.8276	276	W	19	0	0	0	0	0.622222	0	0	0	0	0	0	1	1	0	1	0	2016-09-28 13:15:04	2016-09-28 13:15:09	2.00739	Sep28
X	EH435	EH435X	-116.777	46.833	274	W	11	25.1232	333.333	15.38	30.978	11.4444	0	0	0	1.46667	1.66667	0	1	0	0	0	0	2016-09-28 14:51:15	2016-09-28 14:51:28	2.2559	Sep28
X	EH416	EH416X	-116.78	46.834	273	W	32	1.31507	66.6667	10.8	15.8481	10.6444	0	0.444444	0	0.288889	0	0	0	0	0	1	0	2016-09-28 15:53:07	2016-09-28 15:53:01	2.32002	Sep28
X	EH69	EH69X	-116.793	46.8517	218	S	17	0	0	0	0	2.42222	0	0	0.822222	0	0	0	1	0	0	0	0	2016-09-29 11:16:08	2016-09-29 11:16:12	6.40229	Sep29
X	FC76	FC76X	-116.75	46.8517	308	W	22	15.3041	266.667	16.9375	27.0318	0.177778	5.42222	0	0.266667	0	0	0	0	1	0	1	0	2016-09-29 12:59:50	2016-09-29 13:00:55	11.4596	Sep29
X	FC13	FC13X	-116.721	46.8632	69	E	26	21.2697	400	20.8917	26.0199	0	2.04444	0.155556	0.155556	0	0	0	0	1	0	1	0	2016-09-29 14:35:39	2016-09-29 14:35:55	13.9875	Sep29
X	FC50	FC50X	-116.724	46.8538	46	E	38.5	0	0	0	0	1.24444	0.288889	0	0.6	0	0	0	1	1	0	1	1	2016-09-29 15:29:06	2016-09-29 15:29:24	7.01931	Sep29
X	FC504	FC504X	-116.746	46.8298	222	S	18	10.7231	300	10.3556	21.3331	8.64444	1.22222	0	0	1.51111	0	0	1	0	0	1	0	2016-10-04 12:22:58	2016-10-04 12:23:17	2.42219	Oct4
X	FC548	FC548X	-116.748	46.8268	267	W	36.5	4.35464	266.667	7.8125	14.4194	8.35556	2.82222	0	0	0	0	0	1	0	0	1	0	2016-10-04 13:36:32	2016-10-04 13:36:56	7.76097	Oct4
X	FC184	FC184X	-116.729	46.8469	53	E	11.5	33.3061	866.667	16.9692	22.1203	2.88889	0.933333	0	0.177778	0	0	0	1	0	0	0	0	2016-10-04 15:26:11	2016-10-04 15:26:22	8.5481	Oct4
X	FC30	FC30X	-116.716	46.8555	28	N	22.5	29.8299	633.333	17.7474	24.4886	0.288889	0.422222	0.222222	0	0	0	0.444444	0	1	0	1	0	2016-10-06 12:51:50	2016-10-06 12:51:59	8.68056	Oct6
X	WH463	WH463X	-116.839	46.8307	55	E	16.5	30.9323	766.667	19.6739	22.6651	1.86667	1.02222	0.8	0	0	0	0	1	1	1	0	1	2016-10-06 15:07:05	2016-10-06 15:07:04	16.6897	Oct6
